# Supplementary material for: Barriers to the effective treatment and prevention of malaria in Africa: A systematic review of qualitative studies
Source: Springer Nature journal article supplement (doi:10.1186/1472-698x-9-26), 2009-10-25
Supplement: Additional file 2 [file 1472-698x-9-26-s2.pdf]

|                                                                                 |   |  |   |   |   |   |   |   |   |   |   |   |   |   |   |   |   |   |   |   |
|---------------------------------------------------------------------------------|---|--|---|---|---|---|---|---|---|---|---|---|---|---|---|---|---|---|---|---|
| is due to witchcraft                                                            |   |  |   |   |   |   |   |   |   |   |   |   |   |   |   |   |   |   |   |   |
| Limited understanding of natural history and complications*                     |   |  |   | ✓ |   |   |   | ✓ | ✓ |   | ✓ |   |   | ✓ | ✓ |   |   |   | ✓ |   |
| Complications* of malaria should be treated with traditional remedies           |   |  |   | ✓ |   |   |   | ✓ |   |   |   |   |   | ✓ | ✓ |   |   |   | ✓ |   |
| Fear of adverse events including death from use of SP†                          |   |  |   |   |   |   |   |   |   |   |   |   |   |   |   |   | ✓ |   |   |   |
| <i>Behaviours that may reduce timely access to conventional treatment</i>       |   |  |   |   |   |   |   |   |   |   |   |   |   |   |   |   |   |   |   |   |
| Western medicines used as second resort                                         | ✓ |  |   | ✓ |   | ✓ |   |   |   | ✓ |   |   |   |   |   | ✓ |   |   |   |   |
| Health care facility used as second resort                                      |   |  |   | ✓ |   | ✓ | ✓ |   |   | ✓ |   |   |   |   | ✓ |   | ✓ |   | ✓ | ✓ |
| Treatment for febrile convulsions not sought for 1-3 days                       |   |  |   |   |   |   |   |   |   |   |   |   |   |   |   |   |   |   |   |   |
| Medications stopped when symptoms cease                                         |   |  |   |   | ✓ | ✓ |   |   |   |   |   |   |   |   |   | ✓ |   |   |   |   |
| Hospital treatment sought after cause is relieved by traditional methods        |   |  |   |   |   |   |   |   |   | ✓ |   |   |   |   |   | ✓ |   |   |   |   |
| Treatment plan must be approved by fathers/husbands                             |   |  |   |   |   |   |   |   |   |   | ✓ |   |   |   |   |   |   |   |   |   |
| Conventional treatment failure leads to switch to herbals/traditional treatment |   |  |   |   | ✓ |   |   |   |   |   |   |   |   |   |   |   |   |   |   |   |
| Use of traditional/herbal remedies                                              | ✓ |  | ✓ | ✓ | ✓ | ✓ | ✓ | ✓ | ✓ | ✓ |   | ✓ | ✓ | ✓ | ✓ |   | ✓ |   | ✓ | ✓ |
| <i>Pragmatic obstacles to accessing conventional treatment</i>                  |   |  |   |   |   |   |   |   |   |   |   |   |   |   |   |   |   |   |   |   |
| Distance from facility/practitioner                                             |   |  |   | ✓ |   |   |   |   |   | ✓ |   |   |   |   |   | ✓ |   |   |   | ✓ |
| Costs                                                                           |   |  | ✓ | ✓ |   |   | ✓ |   |   |   |   | ✓ | ✓ |   | ✓ |   |   | ✓ |   |   |

\*convulsions, anemia, splenomegaly

†Sulphadoxine-pyrimethamine
